# Supplementary material for: Comparing diverse extraction methodologies to infer the performance of 1,8-cineole extraction from Eucalyptus cinerea: process optimization, kinetics, and interaction mechanisms
Source: Royal Society of Chemistry journal article supplement (doi:10.1039/d4ra06050d), 2024-01-01
Supplement: d4ra06050d1.pdf [file d4ra06050d1.pdf]

**Supplementary information**

**Comparing Different Extraction Methodologies to Infer 1,8-Cineole Extraction Performance from *Eucalyptus Cinerea*: Process Optimization, Kinetics, and Interaction Mechanism**

Divya Baskaran<sup>a,c</sup>, Madhumitha Sathiamoorthy<sup>b</sup>, Ramasamy Govindarasu<sup>b\*</sup>, and Hun-Soo Byun<sup>a\*</sup>

<sup>a</sup>*Department of Chemical and Biomolecular Engineering, Chonnam National University, Yeosu, Jeonnam-59626, South Korea.*

<sup>b</sup>*Department of Chemical Engineering, Sri Venkateswara College of Engineering, Chennai-602117, India.*

<sup>c</sup>*Department of Biomaterials, Saveetha Dental College and Hospitals, Saveetha Institute of Medical and Technical Sciences, Chennai-600077, India.*

\*Corresponding authors:

Prof. Hun-Soo Byun

e-mail: [hsbyun@jnu.ac.kr](mailto:hsbyun@jnu.ac.kr)

Prof. Ramasamy Govindarasu

e-mail: [rgovind@svce.ac.in](mailto:rgovind@svce.ac.in)

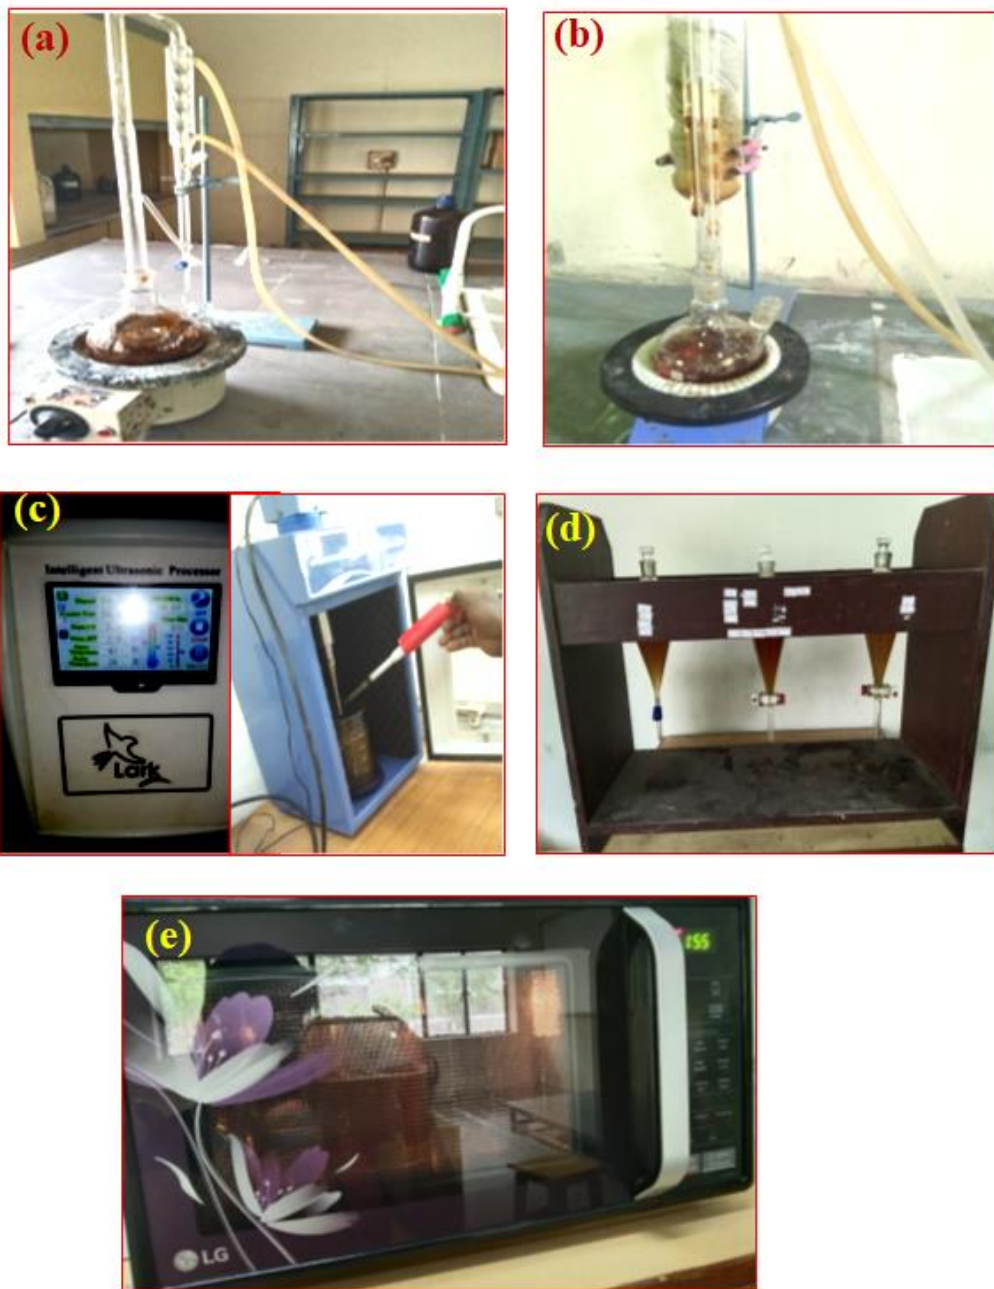

Fig. S1 Photographs of the experimental set-up of (a) the hydro-distillation Clevenger apparatus, (b) the Soxhlet extraction process, (c) the ultrasound extraction technique, (d) the essential oil separation using separating funnels after extraction and (e) the domestic microwave oven.

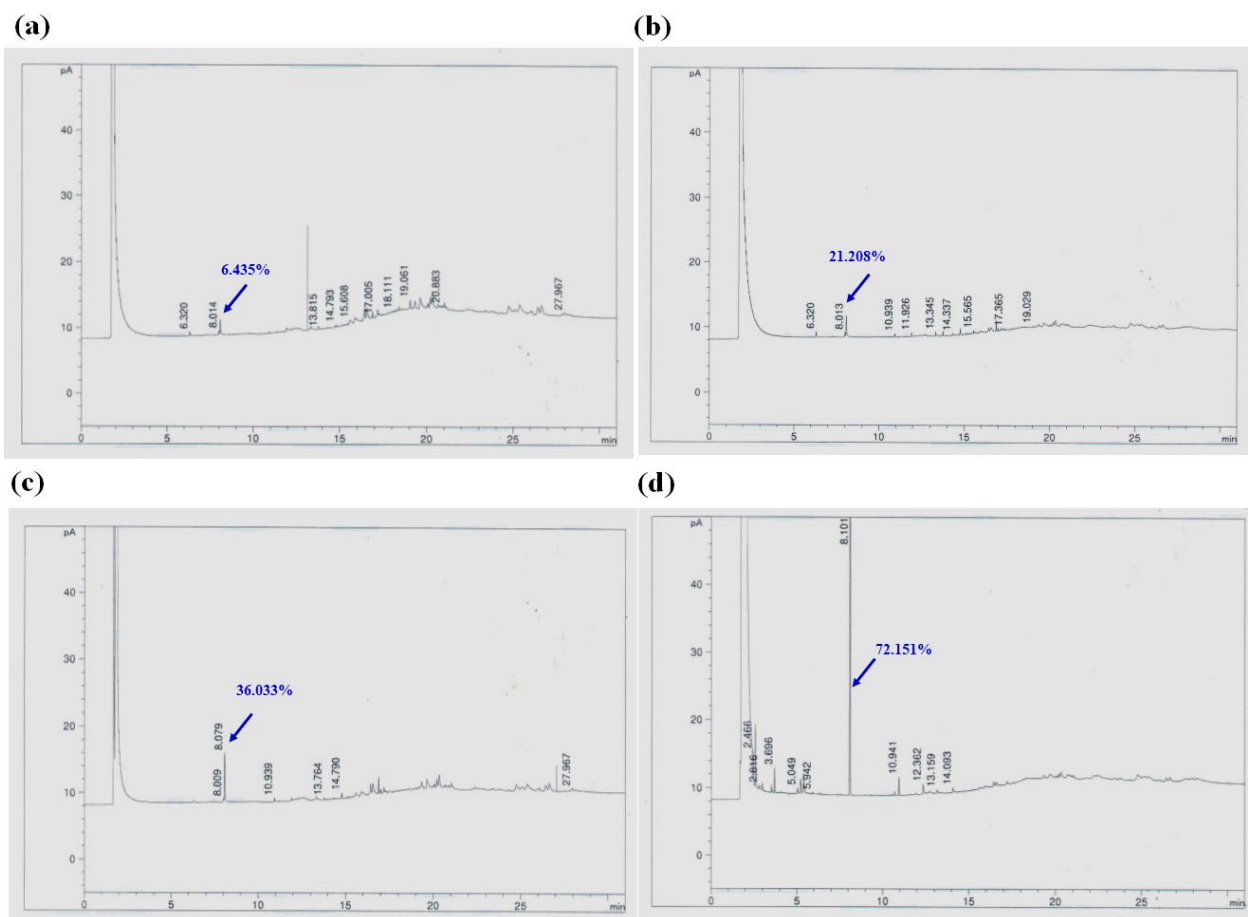

Fig. S2 Gas Chromatogram of the essential oil composition studied for the different samples (a) big foliage (1:25 g/mL), (b) small foliage (1:25 g/mL), (c) big foliage (1:10 g/mL) and (d) small foliage (1:10 g/mL).
